# Supplementary material
Source: publisher figshare collection journal article supplement (https://wiley.figshare.com/ndownloader/files/33661433)
Supplement: Supplementary file 1 [file 33661433]

## Sheet: OCPs_18_04_19
Reference	Samp. Date	Species	Locations	Tissue	Eggs sampl.	α-HCH	β-HCH	β + γ-HCH	γ-HCH	δ-HCH	Σ-HCH as reported in the literature	Σ-HCH used in the current paper	SE-Σ-HCH used in the current paper	trans-nonachlor	SE-trans-nonachlor	cis-nonachlor	SE-cis-nonachlor	oxychlordane	SE-oxychlordane	mirex	SE-mirex	dieldrin	SE-dieldrin
Hillestad 1974	1974	Cc	S Carolina - Georgia, U.S.	whole egg																		56.4
Clack & Kryntsky 1985	1979	Cc	Florida, U.S.	whole egg														8
Clark & Krynitsky 1980	1979	Cm	E Florida, U.S.	whole egg										0				0		0		0
Clark & Krynitsky 1980	1979	Cc	E.Florida, U.S.	whole egg										9				17		5		28
Mckenzie et al. 1999	1995	Cm	Cyprus, Med. sea	whole egg																		0.3	0
Mckenzie et al. 1999	1995	Cc	Cyprus, Med. sea	whole egg																		0.6	0
Alava et al. 2006	2002	Cc	S Florida, U.S.	yolk	22	0.148	0.159					0.307	0.0422137	14.115	4.893	0.26	0.063321	7.845	2.654	0.9615	0.342	2.415	0.415741
Alava et al. 2011	2002	Cc	W Florida, U.S.	yolk	11						0.038	0.038	0.0014	0.498	0.225656	0.02	0.009851	0.884	0.4631	0.088	0.0446	0.426	0.091778
Alava et al. 2011	2002	Cc	E Florida, U.S.	yolk	24						0.09	0.089	0.0633	3.167	0.962	0.099	0.0222	3.537	0.962	0.502	0.27972	0.74	0.1406
Alava et al. 2011	2002	Cc	N Carolina, U.S.	yolk	9						0.233	0.233	0.10299	13.042	5.0388	0.538	0.119301	10.152	4.2237	0.763	0.2223	2.22	0.8151
Munoz & Vermeiren 2018	2002	Ei	Yuc., Mex	yolk	34	2.82		1.26		2.55	6.63	6.63	0.800898	0.63	0.102899	0.15	0.0343	2.13	0.324132	1.64	1.03585	0.25	0.156064
Munoz & Vermeiren 2018	2002	Ei	Yuc., Mex	yolk	35	3.33		0.65		1.64	5.62	5.62	1.50437	0.22	0.148747	0.91	0.187624	0.19	0.05409	0.43	0.030426	1.28	0.216359
Munoz & Vermeiren 2018	2002	Ei	Q. Roo., Mex	yolk	35	2.43		0.9		0.74	4.07	4.07	0.814729	0.05	0.018593	1.16	0.422577	0.06	0.018593	5.42	0.463145	0.44	0.010142
Stewart et al. 2011	2003	Dc	Florida, U.S.	whole egg										1.25	0.2707	0.18	0.00149	0.417	0.057991	0.009		0.535	0.07398
van de Merwe et al. 2010	2004	Cc	Penninsular Malaysia	whole egg	33				0.1723			0.1723	0.0074							0.0094	0.0011
Guirlet et a.l 2010	2006	Dc	French Guiana, Carib. Sea	whole egg	44						0.41	0.41	0.0391965
van de Merwe et al. 2009	2006	Cc	Penninsular Malaysia	whole egg	55						0.0688	0.0688	0.0087
Dyc et al. 2015	2008	Cm	Guadalupe, F.W.I.	yolk	20		0.62				1.47	0.63	0.48
Dyc et al. 2015	2008	Ei	Guadalupe, F.W.I.	yolk	1		0.45				0.73	0.44	0
Dyc et al. 2015	2008	Cm	Guadalupe, F.W.I.	whole egg	13						0.66		0.23
Dyc et al. 2015	2008	Ei	Guadalupe, F.W.I.	whole egg	1						0.47		0
Keller 2013b	2010	Cc	S Carolina, U.S.	yolk	54	1.12	1		1.51				0	2.718	1.16235	0.091	0.01845	2.294	1.0332	0.376	0.175275
Salvarani et al. 2019	2014	Cm	Campeche, Mexico	whole egg	28						0.161	0.161	0.0254242
Salvarani et al. 2019	2014	Ei	Campeche, Mexico	whole egg	32						0.205	0.205	0.0266272
Salvarani et al. 2019	2015	Cm	Campeche, Mexico	whole egg	27						1.643	1.643	1.07882
Salvarani et al. 2019	2015	Ei	Campeche, Mexico	whole egg	27						0.282	0.282	0.0960276
